# Supplementary material for: Diversity of arthropods on Acacia mangium (Fabaceae) and production of this plant with dehydrated sewage sludge in degraded area
Source: R Soc Open Sci. 2020 Feb 26;7(2):191196. doi: 10.1098/rsos.191196 (PMC7062056; doi:10.1098/rsos.191196)
Supplement: Data supporting my manuscript 2 [file rsos191196supp2.xls]

## Sheet: Plan1
TR	BL	RSMAST	IBMAST	RSSUG	IBSUG	RSPOL	IBPOL	RSINTOT	IBINTOT	RSPREDPULG	IBPREDPULG	RSARAN	IBARAN	RSFORM	IBFORM	NGALTOT	NFOLTOT	DANO	COB
1	1	8	26.801	2	3.922	3	5.683	9	24.626	2	2.97	2	3.922	4	8.7	34.1562	27	5.15625	7.625
1	2	5	12.455	1	1.443	3	4.587	10	26.674	2	3.614	2	3.922	5	9.914	31.5625	34.4375	4.71875	7.75
1	3	6	14.709	4	9.824	1	1.443	8	18.281	1	.	2	3.614	4	7.508	30.2812	42.6562	4.40625	6.6875
1	4	2	3.922	3	7.039	2	3.614	7	13.501	.	.	3	5.683	3	6.611	15.9688	22.375	4.46875	5.6875
1	5	4	9.824	3	7.039	1	1.443	11	23.354	3	4.169	2	3.614	5	9.896	13.9375	18.0625	4.375	5.3125
1	6	4	9.86	2	3.922	.	.	11	17.963	1	.	4	7.686	5	7.889	11.0625	14.9375	3.59375	2.875
1	7	1	1.443	3	.	.	.	9	14.312	2	3.614	2	3.922	5	9.217	8.1875	18.3438	4.46875	3.75
1	8	2	3.922	2	3.922	.	.	6	5.485	1	1.443	2	3.922	3	2.905	8.09091	13.5455	2.81818	2.81818
1	9	2	3.922	2	3.922	2	3.614	8	18.419	2	3.614	2	3.922	4	7.92	11.9062	14.9688	3.90625	3.84375
1	10	4	10.66	.	.	2	2.764	9	18.654	.	.	3	6.609	4	6.655	12.75	20.5	8.84375	5.0625
1	11	1	1.443	1	1.443	.	.	7	17.96	1	1.443	3	.	3	5.805	20.375	16.5938	4.3125	7.65625
1	12	3	6.207	3	5.683	2	3.247	12	16.026	3	3.265	3	6.466	5	7.809	22.5938	25.375	4.9375	5.96875
1	13	3	5.683	3	7.039	1	1.443	7	13.998	1	1.443	1	1.443	4	7.479	21.25	21.4062	4.40625	8.90625
1	14	3	7.039	3	.	1	1.443	9	16.153	2	2.607	2	3.614	4	6.476	16.5484	19	3.54839	6.74194
1	15	1	.	.	.	.	.	3	6.466	1	.	.	.	2	3.922	15.5	14.2143	3.35714	6.85714
1	16	3	5.683	.	.	.	.	3	6.953	.	.	.	.	3	6.953	11.8387	19.2258	4.77419	9.58065
1	17	1	1.443	2	3.922	2	3.922	9	22.351	2	2.607	2	3.922	4	9.294	14.7097	18.2258	3.93548	17.5484
1	18	4	10.66	2	3.922	1	1.443	9	19.419	1	1.443	3	7.039	5	9.931	12.3871	22.2903	4.12903	12.7097
1	19	1	1.443	4	9.824	2	3.922	8	19.374	1	1.443	1	1.443	5	10.445	9.22581	17.3871	3.48387	14.5806
1	20	2	3.247	2	3.922	2	3.614	10	15.79	1	1.443	3	6.466	5	7.86	17.7742	20.5161	3.67742	5.12903
1	21	2	3.922	7	18.483	3	6.207	8	2.473	1	1.443	2	3.922	4	1.928	18.2581	29.6452	3.16129	18.3871
1	22	6	17.576	4	10.66	.	.	8	2.193	1	1.443	2	3.922	4	1.963	23.5161	23.0645	3.41935	16.3871
1	23	1	1.443	.	.	2	3.614	7	17.18	1	1.443	2	3.922	2	3.887	18.0253	22.1291	4.64256	5.36983
1	24	.	.	.	.	.	.	1	1.443	.	.	1	1.443	.	.	16.6911	20.9409	3.89363	11.1633
2	1	3	6.207	4	6.086	2	3.809	8	12.77	1	1.443	2	3.922	3	5.028	37.8438	29.4375	5.59375	36.1875
2	2	1	1.443	4	9.106	2	3.614	5	3.404	1	1.443	1	1.443	2	3.864	67.4688	40.5938	5.71875	27.9688
2	3	3	1.806	2	3.247	2	1.802	7	8.855	.	.	2	3.614	4	5.228	64.3125	33.9062	5.8125	26.6562
2	4	3	1.744	4	6.392	2	2.386	7	9.838	1	.	1	1.443	5	7.299	50.5312	37.0938	4.9375	16.0312
2	5	1	1.443	2	3.614	2	3.922	9	20.206	1	1.443	2	3.922	5	8.682	35.9062	40.625	5.1875	19.9375
2	6	2	3.614	1	1.443	2	.	7	15.752	.	.	2	3.614	5	10.095	41.25	29.75	6.53125	15.0312
2	7	5	12.117	.	.	1	.	9	24.378	2	3.614	1	1.443	5	12.224	48.5625	28.3438	4.75	15.25
2	8	2	3.922	3	7.039	2	.	10	11.867	3	7.039	4	9.86	3	2.604	47.5455	24	4.54545	8
2	9	5	7.338	1	1.443	2	3.887	12	3.753	1	1.443	3	5.683	5	2.271	37.1875	26.0938	5.59375	19.0312
2	10	1	1.443	2	.	2	3.247	7	3.758	1	.	1	1.443	4	2.997	38.4062	42.0938	5.6875	26.9688
2	11	2	1.658	1	1.443	1	.	6	9.006	1	1.443	.	.	4	6.44	41.0625	30.5938	6.5	24.625
2	12	7	4.101	6	9.627	2	3.922	15	27.233	3	4.429	3	6.466	6	9.534	49.0625	45	7.4375	30.9375
2	13	4	1.782	3	6.609	2	2.306	11	13.864	3	5.683	1	1.443	6	9.944	37.2188	44.9688	5.5625	29.5
2	14	4	10.66	.	.	2	3.922	9	5.994	1	1.443	3	5.044	5	3.394	47.3548	44.6129	6.45161	28.6129
2	15	.	.	2	.	.	.	2	2.764	.	.	.	.	2	2.764	45.3571	54.3571	6.5	36.5714
2	16	3	6.466	2	.	.	.	7	10.956	1	.	2	.	3	4.63	29.9032	22.9677	9.74194	18.5806
2	17	3	5.044	6	9.833	1	1.443	11	5.687	2	3.614	2	3.614	5	4	37.0968	33.5161	7.16129	46
2	18	5	13.497	2	3.922	2	1.992	9	3.99	2	3.809	1	1.443	5	2.652	41.4194	27.7742	7.19355	40.7097
2	19	2	3.922	2	3.922	1	1.443	8	7.812	1	1.443	2	3.922	5	5.382	40.1935	24.8065	7.09677	36.8387
2	20	4	1.683	3	6.466	2	2.485	9	7.3	2	3.922	2	3.247	5	4.474	38.7419	28.0645	6.83871	33.1935
2	21	3	7.039	3	6.466	2	2.239	8	5.643	1	1.443	2	3.922	5	4.06	32.9032	31.3226	7.96774	32.2258
2	22	3	2.152	2	3.614	3	.	10	10.842	1	1.443	3	7.039	5	7.448	29.4839	39.6774	5.83871	30.4194
2	23	5	3.391	5	.	1	1.443	8	9.193	1	1.443	1	1.443	5	5.648	25.7736	25.6981	5.54717	26.7547
2	24	5	.	2	.	2	.	6	15.239	1	.	1	1.443	4	.	41.9385	34.1434	6.26937	27.2188
